# Supplementary material for: Insights into the solar light driven thermocatalytic oxidation of VOCs over tunnel structured manganese oxides
Source: Royal Society of Chemistry journal article supplement (doi:10.1039/c6cp02776h), 2016-01-01
Supplement: c6cp02776h1.pdf [file c6cp02776h1.pdf]

**Insights into the solar light driven thermocatalytic oxidation of VOCs over  
tunnel structured manganese oxides**

Yali Zheng,<sup>a,b</sup> Wenzhong Wang\*, Dong Jiang,<sup>a,b</sup> Ling Zhang, Xiaoman Li,<sup>a,b</sup>

and Zhong Wang<sup>a,b</sup>

<sup>a</sup> State Key Laboratory of High Performance Ceramics and Superfine  
Microstructures, Shanghai Institute of Ceramics, Chinese Academy of Sciences

1295 Dingxi Road, Shanghai 200050, P. R. China

<sup>b</sup> University of Chinese Academy of Sciences, Beijing 100049, China.

\*Corresponding author (W. Wang) Fax: +86-21-5241-3122, E-mail:

[wzwang@mail.sic.ac.cn](mailto:wzwang@mail.sic.ac.cn)

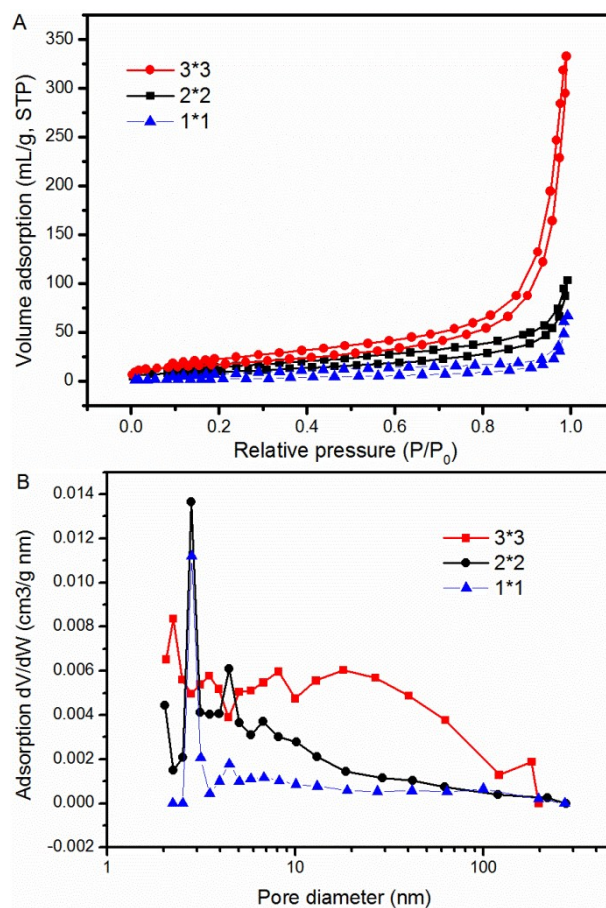

Fig. S1 (A) N<sub>2</sub> adsorption–desorption isotherms and (B) BJH desorption pore size distribution plots of the manganese oxides.

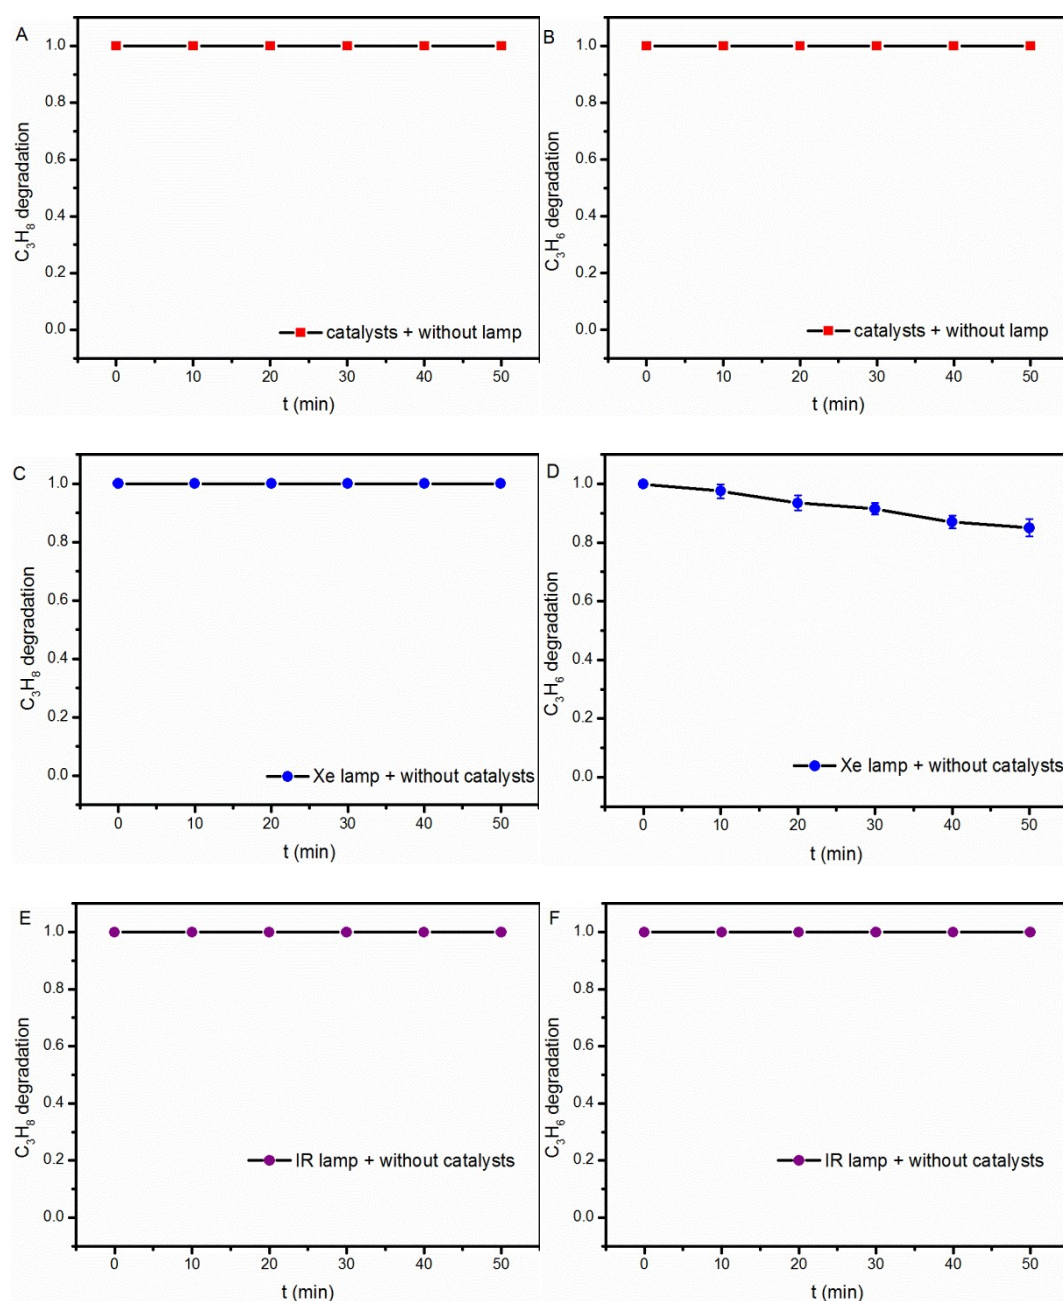

Fig. S2 Blank experiments for  $C_3H_8$  and  $C_3H_6$  oxidation.

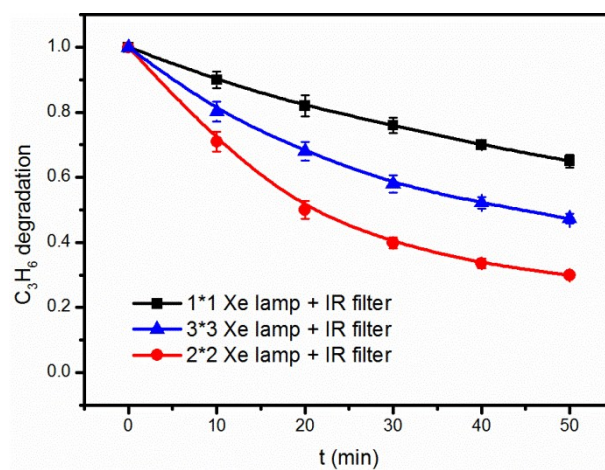

Fig. S3  $C_3H_6$  oxidation over 1\*1, 2\*2, and 3\*3 under the infrared irradiation of the Xe lamp (cutoff filter,  $> 690$  nm).

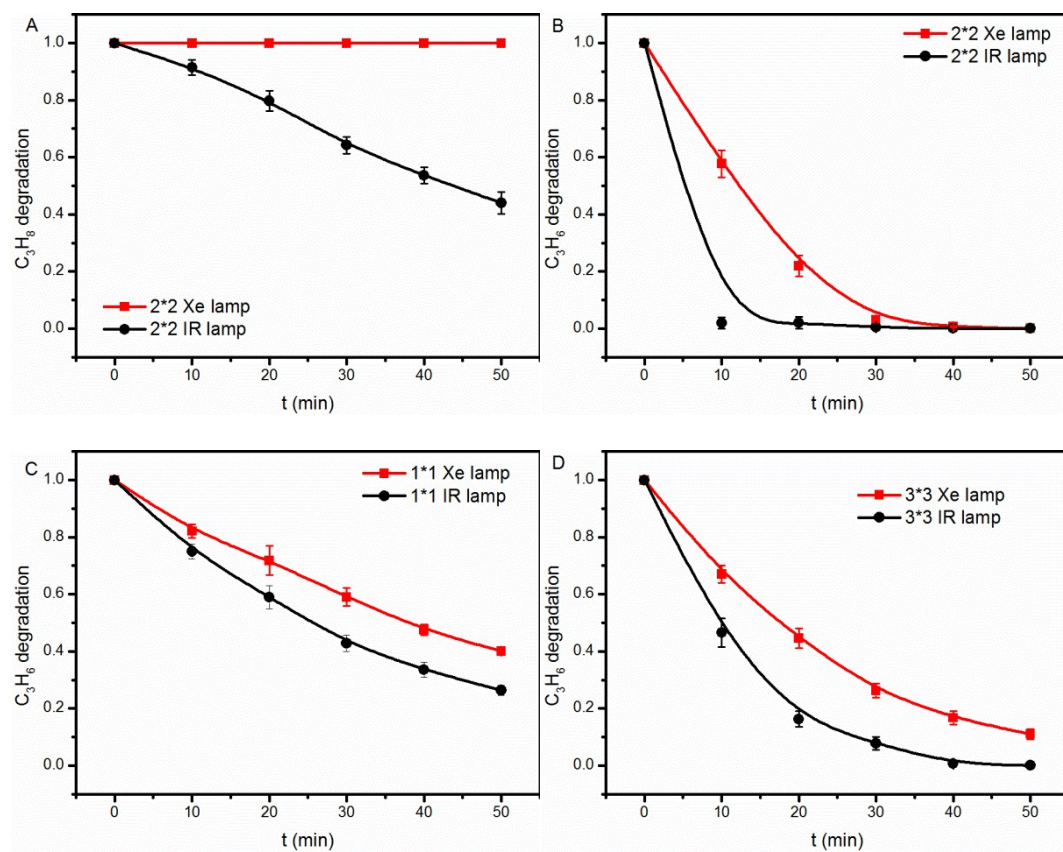

Fig. S4 (A)(B)  $C_3H_8$  and  $C_3H_6$  oxidation over 2\*2 under Xe lamp and IR lamp irradiation. (C)(D)  $C_3H_6$  oxidation over 1\*1, and 3\*3 under Xe lamp and IR lamp irradiation.

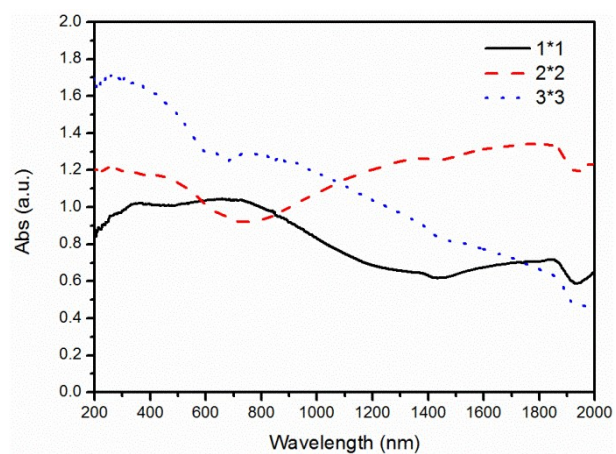

Fig. S5 UV-Vis-IR spectra of the manganese oxides.

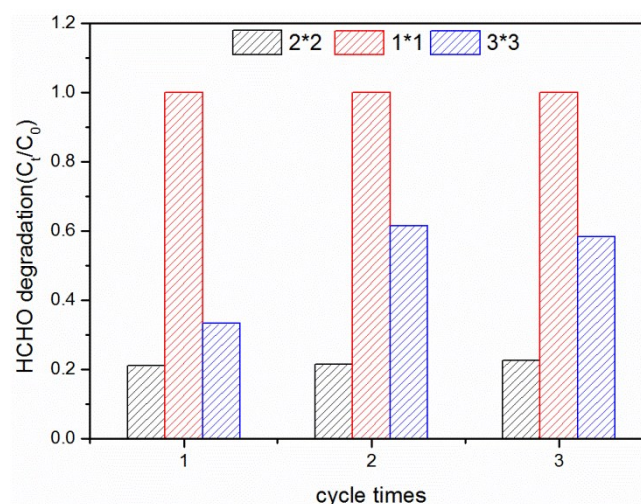

Fig. S6 HCHO degradation rates ( $C_{1h}/C_0$ ) for the 1\*1, 2\*2, and 3\*3 catalysts during the three cycles.

The catalytic oxidation of HCHO without light or heat source was selected as probe reaction to explore the low temperature catalytic activity of the three catalysts. The results are presented in Fig. S5. Each sample was measured for three cycles. As can be seen from the diagram, the 2\*2 catalyst showed the highest catalytic activity for HCHO oxidation, which can eliminate 80% HCHO in 60 min, and the eliminate efficiency remained the same for the three cycles. 1\*1 showed no catalytic or absorption ability towards HCHO, while the degradation rate of 3\*3 for the HCHO oxidation was 67%, 38.4%, and 41.7%, respectively.
